# Supplementary material
Source: PubMed Central journal article supplement (PMC3781937)
Supplement: NIHMS448598-supplement-Supp_Material.pdf [file NIHMS448598-supplement-Supp_Material.pdf]

## Contents

|                                                                                                         |    |
|---------------------------------------------------------------------------------------------------------|----|
| Table S1: Strains used in this study.....                                                               | 2  |
| Table S2: Sequences of primers used for plasmid construction.....                                       | 4  |
| Table S3: List of YmcA-YFP, YlbF-YFP and YFP-YaaT co-isolated proteins.....                             | 5  |
| Figure S1: Spo0A levels are not decreased in <i>ymcA</i> , <i>ylbF</i> and <i>yaaT</i> mutants.....     | 15 |
| Figure S2: A <i>ylbF</i> mutation has an intermediate effect on transcription of <i>abrB::luc</i> ..... | 16 |
| Figure S3: Concentration-dependent effects of YlbF- and GST-YlbF-containing complexes.....              | 17 |
| Additional Experimental Procedures .....                                                                | 18 |
| References .....                                                                                        | 26 |

**Table S1: Strains used in this study**

| <b><i>B. subtilis</i> Strain</b> | <b>Relevant Genotype</b>                                                                                | <b>Source/Ref<sup>1</sup></b> |
|----------------------------------|---------------------------------------------------------------------------------------------------------|-------------------------------|
| BD170                            | <i>trpC2 thr5</i>                                                                                       | Lab strain                    |
| BD630                            | <i>hisA1 leuA8 metB5</i>                                                                                | Lab strain                    |
| BD1991                           | <i>hisA1 leuA8 metB5, amyE::comK'-lacZ' cm</i>                                                          | Hahn <i>et al.</i> , 1995     |
| BD2594                           | <i>hisA1 leuA8 metB5, amyE::comK'-lacZ' cm::spc</i>                                                     | Turgay <i>et al.</i> 1998     |
| BD2741                           | <i>hisA1 leuA8 metB5, ΔylbF::spc</i>                                                                    | Tortosa <i>et al.</i> , 2000  |
| BD3032                           | <i>hisA1 leuA8 metB5, ΔymcA::spc</i>                                                                    | Lab Strain                    |
| BD4319                           | <i>hisA1 leuA8 metB5, amyE: P<sub>lyt</sub>-gfp spc</i>                                                 | Lab Strain                    |
| BD4498                           | <i>hisA1 leuA8 metB5, eps'-lacZ' tet</i>                                                                | Kearns <i>et al.</i> , 2005   |
| BD4576                           | <i>hisA1 leuA8 metB5, Δspo0A::kan</i>                                                                   | Lab Strain                    |
| BD5402                           | <i>hisA1 leuA8 metB5, ylbF-yfp cm</i>                                                                   | This Study                    |
| BD5406                           | <i>hisA1 leuA8 metB5, amyE::comK'-lacZ' spc, ylbF-yfp cm</i>                                            | This Study                    |
| BD5409                           | <i>hisA1 leuA8 metB5, amyE::comK'-lacZ' cm, ΔylbF::spc</i>                                              | This Study                    |
| BD5410                           | <i>hisA1 leuA8 metB5, amyE::comK'-lacZ' cm, ΔymcA::spc</i>                                              | This Study                    |
| BD5494                           | <i>hisA1 leuA8 metB5, ymcA-yfp cm</i>                                                                   | This Study                    |
| BD5495                           | <i>hisA1 leuA8 metB5, amyE::comK'-lacZ' spc, ymcA-yfp cm</i>                                            | This Study                    |
| BD5563                           | <i>hisA1 leuA8 metB5, eps'-lacZ' tet, ΔymcA::spc</i>                                                    | This Study                    |
| BD5564                           | <i>hisA1 leuA8 metB5, eps'-lacZ' tet, ΔylbF::spc</i>                                                    | This Study                    |
| BD5635                           | <i>hisA1 leuA8 metB5, ΔyaaT::ery, P<sub>yaaT</sub>-lacZ'</i>                                            | This Study                    |
| BD5669                           | <i>hisA1 leuA8 metB5, P<sub>spoIIg</sub>-luc cm, ΔymcA::spc</i>                                         | This Study                    |
| BD5670                           | <i>hisA1 leuA8 metB5, P<sub>spoIIg</sub>-luc cm, ΔylbF::spc</i>                                         | This Study                    |
| BD5671                           | <i>hisA1 leuA8 metB5, P<sub>spoIIg</sub>-luc cm, ΔyaaT::ery</i>                                         | This Study                    |
| BD5807                           | 3610, ΔymcA::spc                                                                                        | This Study                    |
| BD5808                           | 3610, ΔylbF::spc                                                                                        | This Study                    |
| BD5809                           | 3610, ΔyaaT::ery                                                                                        | This Study                    |
| BD5829                           | <i>hisA1 leuA8 metB5, P<sub>abrB</sub>-luc cm</i>                                                       | This Study                    |
| BD5860                           | <i>hisA1 leuA8 metB5 P<sub>abrB</sub>-luc cm, Δspo0A::km</i>                                            | This Study                    |
| BD5966                           | <i>hisA1 leuA8 metB5, P<sub>spoIIg</sub>-luc cm</i>                                                     | Prepiak <i>et al.</i> 2011    |
| BD6213                           | <i>hisA1 leuA8 metB5, P<sub>spoIIg</sub>-luc cm, ΔrapA-phrA km</i>                                      | This Study                    |
| BD6214                           | <i>hisA1 leuA8 metB5, P<sub>spoIIg</sub>-luc cm, ΔrapA-phrA km, ΔymcA::spc</i>                          | This Study                    |
| BD6215                           | <i>hisA1 leuA8 metB5, P<sub>spoIIg</sub>-luc cm, ΔrapA-phrA km, ΔylbF::spc</i>                          | This Study                    |
| BD6216                           | <i>hisA1 leuA8 metB5, P<sub>spoIIg</sub>-luc cm, ΔrapA-phrA km, ΔyaaT::ery</i>                          | This Study                    |
| BD6219                           | <i>hisA1 leuA8 metB5, P<sub>spoIIg</sub>-luc cm, Δspo0E::tet</i>                                        | This Study                    |
| BD6220                           | <i>hisA1 leuA8 metB5, P<sub>spoIIg</sub>-luc cm, Δspo0E::tet, ΔymcA::spc</i>                            | This Study                    |
| BD6221                           | <i>hisA1 leuA8 metB5, P<sub>spoIIg</sub>-luc cm, Δspo0E::tet, ΔylbF::spc</i>                            | This Study                    |
| BD6222                           | <i>hisA1 leuA8 metB5, P<sub>spoIIg</sub>-luc cm, Δspo0E::tet, ΔyaaT::ery</i>                            | This Study                    |
| BD6371                           | <i>hisA1 leuA8 metB5, ΔyaaT::ery</i>                                                                    | This Study                    |
| BD6379                           | <i>hisA1 leuA8 metB5, P<sub>spoIIg</sub>-luc tet, amyE::P<sub>spac</sub>-spo0A cm</i>                   | This Study                    |
| BD6385                           | <i>hisA1 leuA8 metB5, P<sub>spoIIg</sub>-luc tet, amyE::P<sub>spac</sub>-spo0A cm, ΔymcA::spc</i>       | This Study                    |
| BD6386                           | <i>hisA1 leuA8 metB5, P<sub>spoIIg</sub>-luc tet, amyE::P<sub>spac</sub>-spo0A cm, ΔylbF::spc</i>       | This Study                    |
| BD6387                           | <i>hisA1 leuA8 metB5, P<sub>spoIIg</sub>-luc tet, amyE::P<sub>spac</sub>-spo0A cm, ΔyaaT::ery</i>       | This Study                    |
| BD6380                           | <i>hisA1 leuA8 metB5, P<sub>spoIIg</sub>-luc cm, amyE::P<sub>spac</sub>-sad-67 D56N tet</i>             | This Study                    |
| BD6381                           | <i>hisA1 leuA8 metB5, P<sub>spoIIg</sub>-luc cm, amyE::P<sub>spac</sub>-sad-67 D56N tet, ΔymcA::spc</i> | This Study                    |
| BD6382                           | <i>hisA1 leuA8 metB5, P<sub>spoIIg</sub>-luc cm, amyE::P<sub>spac</sub>-sad-67 D56N tet, ΔylbF::spc</i> | This Study                    |
| BD6383                           | <i>hisA1 leuA8 metB5, P<sub>spoIIg</sub>-luc cm, amyE::P<sub>spac</sub>-sad-67 D56N tet, ΔyaaT::ery</i> | This Study                    |
| BD6410                           | <i>hisA1 leuA8 metB5, amyE::P<sub>hyperspank</sub>-yfp-yaaT spc</i>                                     | This Study                    |
| BD6411                           | <i>hisA1 leuA8 metB5, amyE::comK'-lacZ' cm, ΔyaaT::ery</i>                                              | This Study                    |
| BD6412                           | <i>hisA1 leuA8 metB5, eps'-lacZ' tet, ΔyaaT::ery</i>                                                    | This Study                    |
| BD6413                           | <i>hisA1 leuA8 metB5, ΔymcA::ery, P<sub>ymcA</sub>-lacZ'</i>                                            | This Study                    |
| BD6414                           | <i>hisA1 leuA8 metB5, ΔylbF::ery, P<sub>ylbF</sub>-lacZ'</i>                                            | This Study                    |
| BD6530                           | <i>hisA1 leuA8 metB5, ΔymcA::ery, P<sub>ymcA</sub>-lacZ', Δspo0A::kan</i>                               | This Study                    |
| BD6531                           | <i>hisA1 leuA8 metB5, ΔylbF::ery, P<sub>ylbF</sub>-lacZ', Δspo0A::kan</i>                               | This Study                    |
| BD6532                           | <i>hisA1 leuA8 metB5, ΔyaaT::ery, P<sub>yaaT</sub>-lacZ', Δspo0A::kan</i>                               | This Study                    |
| BD6600                           | <i>hisA1 leuA8 metB5, P<sub>spoIIg</sub>-luc cm, ΔkinD::tet</i>                                         | This Study                    |
| BD6601                           | <i>hisA1 leuA8 metB5, P<sub>spoIIg</sub>-luc tet, ΔkinD::tet, ΔymcA::spc</i>                            | This Study                    |
| BD6602                           | <i>hisA1 leuA8 metB5, P<sub>spoIIg</sub>-luc tet, ΔkinD::tet, ΔylbF::spc</i>                            | This Study                    |
| BD6603                           | <i>hisA1 leuA8 metB5, P<sub>spoIIg</sub>-luc tet, ΔkinD::tet, ΔyaaT::ery</i>                            | This Study                    |
| BD6707                           | <i>hisA1 leuA8 metB5, P<sub>abrB</sub>-luc cm, ΔylbF::spc</i>                                           | This Study                    |
| NCIB 3610                        | Natural isolate of <i>Bacillus subtilis</i>                                                             | D. Kearns                     |

| <i>E. coli</i> strain | Background/Plasmid                                                         | Source/Ref                    |
|-----------------------|----------------------------------------------------------------------------|-------------------------------|
| BTH101                | Bacterial 2H strain <i>cyd</i> reporter strain                             | Karimova <i>et al.</i> , 2000 |
| PP494                 | BL21 (DE3)/ pET26B- <i>spo0A amp</i>                                       | Muchová <i>et al.</i> , 2004  |
| ED1229                | DH5 $\alpha$ / pUC19- <i>ylbF-yfp amp</i>                                  | This Study                    |
| ED1279                | DH5 $\alpha$ / pUC19- <i>ymcA-yfp amp</i>                                  | This Study                    |
| ED1307                | DH5 $\alpha$ / pT25N- <i>ylbF kan</i>                                      | This Study                    |
| ED1333                | Stellar/ pGEX-6P-1- <i>GST-ymcA amp</i>                                    | This Study                    |
| ED1334                | Stellar/ pGEX-6P-1- <i>GST-ylbF amp</i>                                    | This Study                    |
| ED1350                | DH5 $\alpha$ / pT25N- <i>ymcA kan</i>                                      | This Study                    |
| ED1384                | Stellar/ pT18C- <i>ymcA amp</i>                                            | This Study                    |
| ED1385                | Stellar/ pT25N- <i>yaaT kan</i>                                            | This Study                    |
| ED1427                | BL21 (DE3)/ pET21B- <i>spo0B-His<sub>6</sub> amp</i>                       | Fujita and Losick, 2003       |
| ED1428                | BL21 (DE3)/ pET21B- <i>spo0F-His<sub>6</sub> amp</i>                       | Fujita and Losick, 2003       |
| ED1444                | BL21 (DE3)/ $\Delta$ <i>slrD</i> , pET21B- <i>kinA-His<sub>6</sub> amp</i> | Fujita and Losick, 2003       |
| ED1450                | Stellar/ pTB146- <i>His<sub>6</sub>-SUMO-yaaT amp</i>                      | This Study                    |
| ED1459                | Stellar/ pT18C- <i>spo0A amp</i>                                           | This Study                    |
| ED1460                | Stellar/ pT18C- <i>spo0B amp</i>                                           | This Study                    |
| ED1466                | Stellar/ pT18C- <i>kinA amp</i>                                            | This Study                    |
| ED1467                | Stellar/ pT18C- <i>spo0F amp</i>                                           | This Study                    |
| ED1495                | Stellar/ pMutin4- <i>yaaT-KO amp</i>                                       | This Study                    |
| ED1510                | Stellar/ pDR111- <i>yfp-yaaT amp</i>                                       | This Study                    |
| ED1518                | Stellar/ pMutin4- <i>ymcA amp</i>                                          | This Study                    |
| ED1519                | Stellar/ pMutin4- <i>ylbF amp</i>                                          | This Study                    |
| ED1602                | DH5 $\alpha$ / pGEX-6P-1- <i>GST-spo0E amp</i>                             | This Study                    |

<sup>1</sup>Knockout mutations and constructs that were not made in this study were obtained from the following:  $\Delta$ *ymcA* (A. Neyfakh),  $\Delta$ *spo0A* (M. Fujita),  $\Delta$ *rapAphrA* (N. Mirouze),  $\Delta$ *spo0E::tet* (N. Mirouze),  $\Delta$ *kinD* (R. Losick), *P<sub>spac</sub>-spo0A* (Fujita *et al.*, 2005), and *P<sub>spac</sub>-sad-67* (A. Grossman), *P<sub>xyf</sub>-GFP* (P. Prepiak).

**Table S2: Sequences of primers used for plasmid construction**

| Primer Name                       | Sequence 5' → 3'                                   |
|-----------------------------------|----------------------------------------------------|
| 5 ylbF-ecoRI                      | tggTggGAATTCgagatgattctgcagtcggagacg               |
| 3 ylbF-xhoI                       | ccaccaCTCGAGgggacactttacatccgagcttcc               |
| 5 ymcA-mfeI                       | tggTggCAATTGggctgaagcgcaaatcaatgag                 |
| 3 ymcA-xhoI                       | ccaccaCTCGAGgagagaacagctgttatttgaatgc              |
| 5 YFP-YaaT-INF                    | <b>AAGCTAGCTCCGTCGACT</b> GTACAATGTAATTGGTGTCCGC   |
| 3 YFP-YaaT-INF                    | <b>GAATTAGCTTGCATGCT</b> TAACTCTGTGGTTTGTGCGGATA   |
| 5 YaaTKO_ecoRI                    | tggTggGAATTCgaaaagtatactgtggcaga                   |
| 3 YaaTKO_bamHI                    | ccaccaGGATCCgccgtctcactcatcgcttcc                  |
| 5 ymcA-GST-INF                    | <b>GGGGCCCTGGGATCC</b> ACGCTCTACTCAAAAAAAGAC       |
| 3 ymcA-GST-INF                    | <b>GATGCGGCCGCTCGAG</b> TTAGAGAGAACAGCTGTTATTTG    |
| 5 ylbF-GST-INF                    | <b>GGGGCCCTGGGATCC</b> TATGCGACGATGGAATCCGTG       |
| 3 ylbF-GST-INF                    | <b>GATGCGGCCGCTCGAG</b> TCAGGACACTTTACATCCGCAGC    |
| 5 yaaT-SUMO-INF                   | <b>GAGAACAGATTGGTGGT</b> ATGTACAATGTAATT           |
| 3 yaaT-SUMO-INF                   | <b>GTACCCGGGCTCGAG</b> TAACTCTGTGGTTTGTGCGGATA     |
| 5 ymcA-mutin4                     | tggTggAAGCTTtcaaaaaaagacattgtgcagca                |
| 3 ymcA-mutin4                     | ccaccaGGATCCgaatgcttcactttgaaccg                   |
| 5 ylbF-mutin4                     | tggTggAAGCTTgcttcaaagtgagctcagcagC                 |
| 3 ylbF-mutin4                     | ccaccaGGATCCtccgctgaaccgcagc                       |
| 5spo0E-GST-INF                    | <b>GGGATCCCCGAATTC</b> ATGGGCGGTTCTTCTGAACAAG      |
| 3spo0E-GST-INF                    | <b>GATGCGGCCGCTCGAG</b> TTATTTATTTGCATCATATGCTGGCA |
| <b>Bacterial 2-Hybrid Primers</b> |                                                    |
| <b>Sequence 5' → 3'</b>           |                                                    |
| 5 ylbF-2H-bamHI                   | tggTggGGATCCtatgcgacgatggaatccgtgcg                |
| 3 ylbF-N25-kpnI                   | ccaccaGGTACCggacactttacatccgcagc                   |
| 5 ymcA-N25-bamHI                  | tggTggGGATCCatgacgctctactcaaaaaaagac               |
| 3 ymcA-N25-kpnI                   | ccaccaGGTACCgagagaacagctgttat                      |
| 5 ymcA-C18-INF                    | <b>CGACTCTAGAGGATCC</b> ACGCTCTACTCAAAAAAAGAC      |
| 3 ymcA-C18-INF                    | <b>TTATATCGATGAATTC</b> TTAGAGAGAACACTGTTATTTGAATG |
| 5 yaaT-N25-INF                    | <b>TGATTACGCCAAGCTT</b> ATGTACAATGTAATTGGTGTCCGC   |
| 3 yaaT-N25-INF                    | <b>CCGGGGATCCTCTAGA</b> ATCTGTGGTTTGTGCGGA         |
| 5 spo0A-C18-INF                   | <b>CGACTCTAGAGGATCC</b> GAGAAAATTAAGTTTGTGTTGC     |
| 3 spo0A-C18-INF                   | <b>TTATATCGATGAATTC</b> TTAAGAAGCCTTATGCTCTAACC    |
| 5 spo0B-C18-INF                   | <b>CGACTCTAGAGGATCC</b> AAGGATGTTTCAAAAAATCAAGAA   |
| 3 spo0B-C18-INF                   | <b>TTATATCGATGAATTC</b> CTAGTCCAACCAATTTCAATCA     |
| 5 kinA-C18-INF                    | <b>CGACTCTAGAGGATCC</b> GAACAGGATACGCAGCATGTTA     |
| 3 kinA-C18-INF                    | <b>TTATATCGATGAATTC</b> TTATTTTTTGGAAATGAAATTTTAA  |
| 5 spo0F-C18-INF                   | <b>CGACTCTAGAGGATCC</b> ATGAATGAAAAATTTTAATCGTTGAT |
| 3 spo0F-C18-INF                   | <b>TTATATCGATGAATTC</b> CAGTTAGACTTCAGGGGCAGATA    |

Primers listed in lower-case letters were those used for standard cloning, with the restriction sites in capital letters. The primers in all capital letters are those used with the In-Fusion HD cloning kit, and red sequences represented homology to the vector sequence.

**Table S3: List of YmcA-YFP, YlbF-YFP and YFP-YaaT co-isolated proteins**

|               |                    |                                                           |           | Number of Unique Peptides |           |           |           |           |           |
|---------------|--------------------|-----------------------------------------------------------|-----------|---------------------------|-----------|-----------|-----------|-----------|-----------|
|               |                    |                                                           |           | GFP                       | YmcA-YFP  |           | YlbF-YFP  |           | YFP-YaaT  |
| Accession #   | Gene name          | Description                                               | MW (kDa)  | Control                   | #1        | #2        | #1        | #2        | #1        |
| P02968        | <i>hag</i>         | Flagellin                                                 | 33        | 168                       | 196       | 12        | 133       | 11        | 52        |
| <b>P42212</b> | <b><i>gfp</i></b>  | <b>Green fluorescent protein</b>                          | <b>27</b> | <b>14</b>                 | <b>52</b> | <b>34</b> | <b>48</b> | <b>25</b> | <b>29</b> |
| P42175        | <i>narG</i>        | Nitrate reductase alpha chain                             | 139       | 69                        | 109       | 26        | 100       | 26        | 83        |
| <b>P37541</b> | <b><i>yaaT</i></b> | <b>Stage 0 sporulation protein</b>                        | <b>31</b> | <b>0</b>                  | <b>22</b> | <b>15</b> | <b>56</b> | <b>15</b> | <b>55</b> |
| P37871        | <i>rpoC</i>        | DNA-directed RNA polymerase subunit beta'                 | 134       | 57                        | 42        | 16        | 67        | 10        | 56        |
| Q04747        | <i>srfAB</i>       | Surfactin synthase subunit 2                              | 401       | 46                        | 23        | 55        | 35        | 41        | 95        |
| P27206        | <i>srfAA</i>       | Surfactin synthase subunit 1                              | 402       | 46                        | 19        | 36        | 31        | 21        | 86        |
| O34425        | <i>gapB</i>        | Glyceraldehyde-3-phosphate dehydrogenase                  | 37        | 23                        | 34        | 14        | 44        | 14        | 31        |
| P33166        | <i>tuf</i>         | Elongation factor Tu                                      | 44        | 16                        | 12        | 18        | 32        | 10        | 31        |
| P42921        | <i>rplD</i>        | 50S ribosomal protein L4                                  | 22        | 21                        | 19        | 0         | 31        | 0         | 11        |
| <b>O34412</b> | <b><i>ylbF</i></b> | <b>Regulatory protein</b>                                 | <b>17</b> | <b>0</b>                  | <b>10</b> | <b>23</b> | <b>50</b> | <b>23</b> | <b>8</b>  |
| <b>O31779</b> | <b><i>ymcA</i></b> | <b>Uncharacterized protein</b>                            | <b>16</b> | <b>0</b>                  | <b>53</b> | <b>27</b> | <b>48</b> | <b>26</b> | <b>9</b>  |
| P37870        | <i>rpoB</i>        | DNA-directed RNA polymerase subunit beta                  | 134       | 38                        | 29        | 11        | 31        | 7         | 46        |
| P71079        | <i>fabL</i>        | Enoyl-[acyl-carrier-protein] reductase [NADPH]            | 27        | 18                        | 25        | 3         | 22        | 3         | 13        |
| P71011        | <i>albA</i>        | Antilisterial bacteriocin subtilosin biosynthesis protein | 52        | 22                        | 22        | 16        | 11        | 16        | 35        |
| P96574        | <i>mtlR</i>        | Transcriptional regulator                                 | 79        | 34                        | 40        | 0         | 19        | 0         | 26        |
| P80868        | <i>fusA</i>        | Elongation factor G                                       | 77        | 8                         | 4         | 16        | 31        | 8         | 34        |
| P32397        | <i>hemY</i>        | Protoporphyrinogen oxidase                                | 51        | 33                        | 29        | 1         | 11        | 0         | 20        |
| P94391        | <i>ycgN</i>        | 1-pyrroline-5-carboxylate dehydrogenase 2                 | 56        | 9                         | 5         | 16        | 30        | 13        | 30        |

|        |               |                                                                                                    |     |    |    |    |    |    |    |
|--------|---------------|----------------------------------------------------------------------------------------------------|-----|----|----|----|----|----|----|
| P18157 | <i>glpK</i>   | Glycerol kinase                                                                                    | 55  | 21 | 15 | 24 | 28 | 21 | 30 |
| P21465 | <i>rpsC</i>   | 30S ribosomal protein S3                                                                           | 24  | 15 | 17 | 10 | 17 | 8  | 13 |
| P46911 | <i>qcrA</i>   | Menaquinol-cytochrome c reductase iron-sulfur subunit                                              | 19  | 2  | 35 | 15 | 2  | 7  | 0  |
| P21464 | <i>rpsB</i>   | 30S ribosomal protein S2                                                                           | 28  | 14 | 16 | 5  | 16 | 3  | 12 |
| P42920 | <i>rplC</i>   | 50S ribosomal protein L3                                                                           | 23  | 18 | 21 | 0  | 12 | 0  | 6  |
| O31774 | <i>ymdA</i>   | 2',3'-cyclic-nucleotide 2'-phosphodiesterase                                                       | 59  | 1  | 1  | 4  | 3  | 4  | 32 |
| Q03222 | <i>rho</i>    | Transcription termination factor                                                                   | 49  | 25 | 26 | 18 | 15 | 18 | 13 |
| P37809 | <i>atpD</i>   | ATP synthase subunit beta                                                                          | 51  | 14 | 6  | 15 | 16 | 13 | 24 |
| P38021 | <i>rocD</i>   | Ornithine aminotransferase                                                                         | 44  | 16 | 14 | 21 | 29 | 17 | 17 |
| P39634 | <i>rocA</i>   | 1-pyrroline-5-carboxylate dehydrogenase                                                            | 56  | 14 | 5  | 12 | 21 | 6  | 26 |
| P39738 | <i>fliD</i>   | Flagellar hook-associated protein 2                                                                | 55  | 23 | 25 | 0  | 12 | 0  | 15 |
| P80886 | <i>sucC</i>   | Succinyl-CoA ligase [ADP-forming] subunit beta                                                     | 41  | 13 | 9  | 19 | 20 | 18 | 29 |
| P50735 | <i>gudB</i>   | NAD-specific glutamate dehydrogenase                                                               | 47  | 12 | 12 | 12 | 22 | 12 | 21 |
| P42176 | <i>narH</i>   | Nitrate reductase beta chain                                                                       | 55  | 15 | 15 | 7  | 18 | 7  | 25 |
| P09339 | <i>citB</i>   | Aconitate hydratase                                                                                | 99  | 1  | 1  | 21 | 24 | 15 | 42 |
| O07021 | <i>lutB</i>   | Lactate utilization protein B                                                                      | 53  | 13 | 12 | 10 | 16 | 9  | 18 |
| P42435 | <i>nasD</i>   | Nitrite reductase [NAD(P)H]                                                                        | 88  | 11 | 11 | 15 | 13 | 14 | 39 |
| P17820 | <i>dnaK</i>   | Chaperone protein                                                                                  | 66  | 12 | 7  | 18 | 9  | 16 | 29 |
| Q08787 | <i>surfAC</i> | Surfactin synthase subunit 3                                                                       | 144 | 9  | 3  | 8  | 11 | 3  | 25 |
| Q05852 | <i>gtaB</i>   | UTP--glucose-1-phosphate uridylyltransferase                                                       | 33  | 13 | 20 | 16 | 17 | 16 | 10 |
| P28598 | <i>groL</i>   | 60 chaperonin                                                                                      | 57  | 18 | 18 | 11 | 10 | 10 | 26 |
| P42919 | <i>rplB</i>   | 50S ribosomal protein L2                                                                           | 30  | 6  | 9  | 4  | 11 | 2  | 10 |
| O32006 | <i>yokA</i>   | Resolvase homolog                                                                                  | 63  | 29 | 23 | 0  | 3  | 0  | 11 |
| O07603 | <i>yhfE</i>   | Putative aminopeptidase                                                                            | 39  | 12 | 12 | 13 | 4  | 12 | 20 |
| Q01465 | <i>mreB</i>   | Rod shape-determining protein                                                                      | 36  | 12 | 11 | 7  | 10 | 6  | 19 |
| P28366 | <i>secA</i>   | Protein translocase subunit                                                                        | 96  | 11 | 3  | 11 | 21 | 10 | 33 |
| P54716 | <i>glvA</i>   | Maltose-6'-phosphate glucosidase                                                                   | 51  | 9  | 13 | 19 | 29 | 17 | 16 |
| P16263 | <i>odhB</i>   | Dihydropolypyllysine-residue succinyltransferase component of 2-oxoglutarate dehydrogenase complex | 46  | 10 | 9  | 19 | 18 | 18 | 21 |

|        |              |                                                              |     |    |    |    |    |    |    |
|--------|--------------|--------------------------------------------------------------|-----|----|----|----|----|----|----|
| P08066 | <i>sdhB</i>  | Succinate dehydrogenase iron-sulfur subunit                  | 28  | 5  | 5  | 10 | 16 | 9  | 9  |
| P39633 | <i>rocG</i>  | NAD-specific glutamate dehydrogenase                         | 47  | 16 | 7  | 8  | 9  | 6  | 23 |
| P08065 | <i>sdhA</i>  | Succinate dehydrogenase flavoprotein subunit                 | 65  | 15 | 3  | 16 | 10 | 12 | 29 |
| P25994 | <i>pyrAB</i> | Carbamoyl-phosphate synthase pyrimidine-specific large chain | 118 | 10 | 0  | 29 | 7  | 20 | 30 |
| P21466 | <i>rpsD</i>  | 30S ribosomal protein S4                                     | 23  | 9  | 15 | 6  | 14 | 4  | 9  |
| P37869 | <i>eno</i>   | Enolase                                                      | 47  | 10 | 6  | 16 | 13 | 15 | 21 |
| P12425 | <i>glnA</i>  | Glutamine synthetase                                         | 50  | 1  | 6  | 15 | 14 | 13 | 20 |
| P54452 | <i>yqeG</i>  | Uncharacterized protein                                      | 20  | 13 | 10 | 1  | 7  | 0  | 2  |
| P21880 | <i>pdhD</i>  | Dihydrolipoyl dehydrogenase                                  | 50  | 11 | 1  | 4  | 13 | 2  | 21 |
| P37808 | <i>atpA</i>  | ATP synthase subunit alpha                                   | 55  | 5  | 4  | 9  | 15 | 7  | 21 |
| P18158 | <i>glpD</i>  | Aerobic glycerol-3-phosphate dehydrogenase                   | 63  | 10 | 5  | 4  | 19 | 3  | 27 |
| P21881 | <i>pdhA</i>  | Pyruvate dehydrogenase E1 component subunit alpha            | 42  | 9  | 6  | 8  | 13 | 7  | 21 |
| P42412 | <i>iolA</i>  | Methylmalonate semialdehyde dehydrogenase [acylating]        | 53  | 5  | 7  | 6  | 17 | 4  | 21 |
| P42060 | <i>rplV</i>  | 50S ribosomal protein L22                                    | 12  | 9  | 6  | 0  | 7  | 0  | 3  |
| P42415 | <i>iolD</i>  | 3D-(3,5/4)-trihydroxycyclohexane-1,2-dione hydrolase         | 70  | 7  | 2  | 8  | 12 | 5  | 25 |
| P14577 | <i>rplP</i>  | 50S ribosomal protein L16                                    | 16  | 10 | 11 | 5  | 10 | 5  | 5  |
| P21467 | <i>rpsE</i>  | 30S ribosomal protein S5                                     | 18  | 10 | 11 | 7  | 13 | 5  | 9  |
| P21879 | <i>guaB</i>  | Inosine-5'-monophosphate dehydrogenase                       | 53  | 14 | 10 | 4  | 14 | 1  | 19 |
| O06478 | <i>yfmT</i>  | Putative aldehyde dehydrogenase                              | 53  | 7  | 3  | 5  | 12 | 5  | 24 |
| P09124 | <i>gapA</i>  | Glyceraldehyde-3-phosphate dehydrogenase 1                   | 36  | 7  | 6  | 7  | 10 | 5  | 12 |
| P39793 | <i>ponA</i>  | Penicillin-binding protein 1A/1B                             | 100 | 19 | 13 | 5  | 6  | 4  | 23 |
| P21882 | <i>pdhB</i>  | Pyruvate dehydrogenase E1 component subunit beta             | 35  | 9  | 7  | 14 | 15 | 12 | 17 |
| P12877 | <i>rplE</i>  | 50S ribosomal protein L5                                     | 20  | 11 | 11 | 6  | 12 | 1  | 7  |
| P96614 | <i>cshA</i>  | DEAD-box ATP-dependent RNA helicase                          | 55  | 19 | 5  | 2  | 8  | 2  | 13 |
| O32162 | <i>sufB</i>  | FeS cluster assembly protein                                 | 53  | 3  | 0  | 6  | 6  | 1  | 17 |
| O31749 | <i>pyrH</i>  | Uridylate kinase                                             | 26  | 9  | 6  | 3  | 6  | 2  | 6  |
| P16971 | <i>recA</i>  | Protein recA                                                 | 38  | 10 | 8  | 4  | 10 | 4  | 12 |
| P21469 | <i>rpsG</i>  | 30S ribosomal protein S7                                     | 18  | 6  | 8  | 7  | 5  | 6  | 4  |
| O34660 | <i>dhaS</i>  | Putative aldehyde dehydrogenase                              | 54  | 8  | 5  | 15 | 6  | 15 | 17 |

|        |             |                                                            |     |    |    |    |    |    |    |
|--------|-------------|------------------------------------------------------------|-----|----|----|----|----|----|----|
| P54420 | <i>asnB</i> | Asparagine synthetase [glutamine-hydrolyzing] 1 OS         | 73  | 6  | 2  | 10 | 8  | 6  | 22 |
| P23129 | <i>odhA</i> | 2-oxoglutarate dehydrogenase E1 component                  | 106 | 6  | 3  | 7  | 13 | 6  | 21 |
| P55873 | <i>rplT</i> | 50S ribosomal protein L20                                  | 14  | 3  | 5  | 0  | 8  | 0  | 6  |
| Q06797 | <i>rplA</i> | 50S ribosomal protein L1                                   | 25  | 7  | 7  | 5  | 14 | 2  | 10 |
| P39126 | <i>icd</i>  | Isocitrate dehydrogenase [NADP]                            | 46  | 5  | 1  | 9  | 14 | 6  | 16 |
| O32129 | <i>lipA</i> | Lipoyl synthase                                            | 34  | 8  | 6  | 0  | 13 | 0  | 12 |
| P26935 | <i>iolg</i> | Inositol 2-dehydrogenase/D-chiro-inositol 3-dehydrogenase  | 38  | 5  | 3  | 7  | 13 | 2  | 13 |
| O34909 | <i>yeaR</i> | Putative adenine deaminase year                            | 67  | 9  | 2  | 0  | 7  | 0  | 17 |
| P54531 | <i>yqiT</i> | Leucine dehydrogenase                                      | 40  | 2  | 6  | 4  | 13 | 2  | 15 |
| O34454 | <i>ykaA</i> | UPF0111 protein                                            | 24  | 11 | 10 | 4  | 11 | 2  | 4  |
| P39754 | <i>glmS</i> | Glucosamine--fructose-6-phosphate aminotransferase 3       | 65  | 5  | 0  | 3  | 5  | 1  | 22 |
| P30949 | <i>hemL</i> | Glutamate-1-semialdehyde 2,1-aminomutase                   | 46  | 8  | 4  | 10 | 6  | 10 | 14 |
| Q45493 | <i>rnjA</i> | Ribonuclease J 1                                           | 62  | 9  | 4  | 3  | 5  | 2  | 17 |
| Q03224 | <i>ywjI</i> | Uncharacterized protein                                    | 34  | 4  | 2  | 2  | 6  | 1  | 13 |
| P39148 | <i>glyA</i> | Serine hydroxymethyltransferase                            | 45  | 9  | 4  | 8  | 9  | 6  | 17 |
| P54419 | <i>metK</i> | S-adenosylmethionine synthase                              | 44  | 10 | 2  | 7  | 15 | 5  | 18 |
| P24141 | <i>oppA</i> | Oligopeptide-binding protein                               | 62  | 0  | 2  | 7  | 10 | 5  | 15 |
| P17631 | <i>dnaJ</i> | Chaperone protein                                          | 41  | 6  | 6  | 3  | 3  | 3  | 18 |
| O31742 | <i>rplS</i> | 50S ribosomal protein L19                                  | 13  | 7  | 10 | 2  | 8  | 0  | 5  |
| O34529 | <i>pfkA</i> | 6-phosphofructokinase                                      | 34  | 8  | 5  | 4  | 9  | 3  | 8  |
| O31782 | <i>pksN</i> | Polyketide synthase                                        | 610 | 5  | 2  | 4  | 4  | 1  | 15 |
| P05653 | <i>gyrA</i> | DNA gyrase subunit A                                       | 92  | 10 | 8  | 7  | 3  | 6  | 24 |
| P20429 | <i>rpoA</i> | DNA-directed RNA polymerase subunit alpha                  | 35  | 10 | 9  | 4  | 8  | 2  | 12 |
| P39776 | <i>xerC</i> | Tyrosine recombinase                                       | 35  | 12 | 7  | 0  | 3  | 0  | 0  |
| P28619 | <i>rph</i>  | Ribonuclease PH                                            | 27  | 9  | 6  | 0  | 6  | 0  | 6  |
| O32038 | <i>aspS</i> | Aspartyl-tRNA synthetase                                   | 66  | 5  | 0  | 0  | 15 | 0  | 14 |
| P45745 | <i>dhbF</i> | Dimodular nonribosomal peptide synthase                    | 264 | 1  | 4  | 0  | 2  | 0  | 17 |
| O32267 | <i>tuaH</i> | Putative teichuronic acid biosynthesis glycosyltransferase | 46  | 15 | 5  | 0  | 5  | 0  | 8  |
| P54423 | <i>wprA</i> | Cell wall-associated protease                              | 96  | 5  | 3  | 4  | 8  | 3  | 9  |



|        |              |                                                                                   |    |    |   |    |    |   |    |
|--------|--------------|-----------------------------------------------------------------------------------|----|----|---|----|----|---|----|
| O32259 | <i>lutC</i>  | Lactate utilization protein C                                                     | 26 | 9  | 5 | 7  | 10 | 7 | 5  |
| P39120 | <i>citZ</i>  | Citrate synthase 2                                                                | 42 | 4  | 2 | 9  | 7  | 9 | 13 |
| P36947 | <i>rbsA</i>  | Ribose import ATP-binding protein                                                 | 55 | 13 | 5 | 6  | 13 | 4 | 11 |
| P37570 | <i>yacl</i>  | Putative ATP:guanido phosphotransferase                                           | 41 | 8  | 8 | 2  | 4  | 1 | 15 |
| P45694 | <i>tkt</i>   | Transketolase                                                                     | 72 | 3  | 0 | 6  | 8  | 3 | 19 |
| P94356 | <i>yxkC</i>  | Uncharacterized protein                                                           | 19 | 5  | 5 | 5  | 9  | 5 | 7  |
| P21470 | <i>rpsl</i>  | 30S ribosomal protein S9                                                          | 14 | 5  | 6 | 0  | 6  | 0 | 3  |
| P25144 | <i>ccpA</i>  | Catabolite control protein A                                                      | 37 | 12 | 3 | 0  | 9  | 0 | 9  |
| P04969 | <i>rpsK</i>  | 30S ribosomal protein S11                                                         | 14 | 4  | 6 | 0  | 9  | 0 | 5  |
| P14193 | <i>prs</i>   | Ribose-phosphate pyrophosphokinase                                                | 35 | 8  | 4 | 10 | 7  | 8 | 9  |
| P42065 | <i>appF</i>  | Oligopeptide transport ATP-binding protein                                        | 37 | 11 | 9 | 6  | 4  | 5 | 8  |
| P42414 | <i>iolC</i>  | 5-dehydro-2-deoxygluconokinase                                                    | 36 | 1  | 0 | 4  | 3  | 2 | 16 |
| P39751 | <i>mbl</i>   | MreB-like protein                                                                 | 36 | 5  | 5 | 5  | 8  | 5 | 12 |
| P21883 | <i>pdhC</i>  | Dihydrolipoyllysine-acetyltransferase component of pyruvate dehydrogenase complex | 48 | 3  | 2 | 6  | 3  | 6 | 16 |
| P39912 | <i>aroA</i>  | Phospho-2-dehydro-3-deoxyheptonate aldolase                                       | 40 | 8  | 4 | 0  | 6  | 0 | 12 |
| P54479 | <i>zur</i>   | Zinc-specific metallo-regulatory protein                                          | 17 | 8  | 7 | 0  | 10 | 0 | 5  |
| O31777 | <i>kbl</i>   | Putative 8-amino-7-oxononanoate synthase/2-amino-3-ketobutyrate coenzyme A ligase | 43 | 8  | 3 | 3  | 3  | 2 | 15 |
| P94390 | <i>ycgM</i>  | Proline dehydrogenase 2                                                           | 35 | 10 | 7 | 4  | 8  | 3 | 11 |
| P54377 | <i>gcvPB</i> | Probable glycine dehydrogenase [decarboxylating] subunit 2                        | 54 | 10 | 3 | 10 | 3  | 8 | 10 |
| P39616 | <i>ywdH</i>  | Probable aldehyde dehydrogenase ywdH                                              | 51 | 11 | 9 | 0  | 3  | 0 | 8  |
| O31778 | <i>miaB</i>  | (Dimethylallyl)adenosine tRNA methylthiotransferase                               | 58 | 3  | 1 | 8  | 11 | 5 | 13 |
| P42418 | <i>iolH</i>  | Unknown Protein                                                                   | 34 | 5  | 5 | 9  | 11 | 9 | 10 |
| O31760 | <i>rnjB</i>  | Ribonuclease J 2                                                                  | 61 | 10 | 2 | 5  | 6  | 4 | 13 |
| O34857 | <i>rok</i>   | Repressor                                                                         | 22 | 12 | 1 | 4  | 0  | 4 | 2  |
| P39814 | <i>topA</i>  | DNA topoisomerase 1                                                               | 79 | 20 | 3 | 9  | 2  | 9 | 15 |
| P37527 | <i>pdxS</i>  | Pyridoxal biosynthesis lyase                                                      | 32 | 5  | 4 | 6  | 8  | 5 | 7  |
| P08821 | <i>hupA</i>  | DNA-binding protein HU 1                                                          | 10 | 7  | 6 | 0  | 7  | 0 | 4  |

|        |             |                                                    |     |    |    |    |    |    |    |
|--------|-------------|----------------------------------------------------|-----|----|----|----|----|----|----|
| P39778 | <i>clpY</i> | ATP-dependent protease ATPase subunit              | 53  | 7  | 6  | 6  | 4  | 5  | 11 |
| P39772 | <i>asnS</i> | Asparaginyl-tRNA synthetase                        | 49  | 12 | 4  | 5  | 9  | 4  | 13 |
| P46337 | <i>iolR</i> | HTH-type transcriptional regulator                 | 28  | 10 | 6  | 4  | 5  | 4  | 1  |
| P17889 | <i>infB</i> | Translation initiation factor IF-2                 | 79  | 5  | 2  | 0  | 6  | 0  | 13 |
| P54717 | <i>glvR</i> | HTH-type transcriptional regulator                 | 29  | 12 | 13 | 6  | 11 | 5  | 3  |
| P24327 | <i>prsA</i> | Foldase protein                                    | 33  | 2  | 2  | 4  | 4  | 3  | 10 |
| P19669 | <i>tal</i>  | Transaldolase                                      | 23  | 7  | 10 | 10 | 11 | 10 | 6  |
| P46898 | <i>rplF</i> | 50S ribosomal protein L6                           | 20  | 7  | 4  | 0  | 5  | 0  | 8  |
| P37945 | <i>lon1</i> | Lon protease 1                                     | 87  | 6  | 0  | 2  | 1  | 2  | 17 |
| P29726 | <i>purA</i> | Adenylosuccinate synthetase                        | 48  | 3  | 0  | 5  | 6  | 2  | 15 |
| P50866 | <i>clpX</i> | ATP-dependent Clp protease ATP-binding subunit     | 46  | 5  | 1  | 7  | 6  | 5  | 13 |
| O07573 | <i>nsrR</i> | HTH-type transcriptional regulator                 | 17  | 8  | 5  | 0  | 3  | 0  | 3  |
| P42923 | <i>rplJ</i> | 50S ribosomal protein L10                          | 18  | 5  | 6  | 0  | 7  | 0  | 7  |
| P02394 | <i>rplL</i> | 50S ribosomal protein L7/L12                       | 13  | 3  | 6  | 0  | 7  | 0  | 6  |
| P20277 | <i>rplQ</i> | 50S ribosomal protein L17                          | 14  | 3  | 3  | 0  | 4  | 0  | 4  |
| P21474 | <i>rpsP</i> | 30S ribosomal protein S16                          | 10  | 6  | 4  | 0  | 5  | 0  | 5  |
| P39142 | <i>pdp</i>  | Pyrimidine-nucleoside phosphorylase                | 46  | 3  | 0  | 5  | 3  | 4  | 16 |
| P26908 | <i>rplU</i> | 50S ribosomal protein L21                          | 11  | 3  | 5  | 0  | 3  | 0  | 4  |
| O31494 | <i>ydzF</i> | Uncharacterized HTH-type transcriptional regulator | 13  | 7  | 7  | 0  | 5  | 0  | 5  |
| O06714 | <i>sbcC</i> | Nuclease sbcCD subunit C                           | 129 | 0  | 0  | 0  | 1  | 0  | 17 |
| O31766 | <i>ymfH</i> | Uncharacterized zinc protease                      | 49  | 0  | 0  | 0  | 1  | 0  | 19 |
| P24281 | <i>yaaK</i> | UPF0133 protein                                    | 12  | 3  | 2  | 4  | 1  | 4  | 4  |
| Q06796 | <i>rplK</i> | 50S ribosomal protein L11                          | 15  | 3  | 5  | 0  | 7  | 0  | 5  |
| P71018 | <i>plsX</i> | Phosphate acyltransferase                          | 36  | 6  | 2  | 4  | 1  | 3  | 10 |
| P21471 | <i>rpsJ</i> | 30S ribosomal protein S10                          | 12  | 6  | 6  | 4  | 7  | 3  | 5  |
| P12876 | <i>rplX</i> | 50S ribosomal protein L24                          | 11  | 2  | 3  | 0  | 5  | 0  | 4  |
| O06491 | <i>gatB</i> | Glutamyl-tRNA(Gln) amidotransferase subunit A      | 53  | 3  | 1  | 5  | 7  | 1  | 11 |
| O06975 | <i>whiA</i> | Putative sporulation transcription regulator       | 36  | 13 | 10 | 3  | 1  | 3  | 2  |
| O32117 | <i>yutJ</i> | NADH dehydrogenase-like protein                    | 40  | 15 | 3  | 3  | 3  | 3  | 5  |

|        |              |                                                                                               |     |    |   |   |    |   |    |
|--------|--------------|-----------------------------------------------------------------------------------------------|-----|----|---|---|----|---|----|
| P24137 | <i>oppF</i>  | Oligopeptide transport ATP-binding protein                                                    | 35  | 11 | 2 | 6 | 5  | 4 | 5  |
| P08838 | <i>ptsI</i>  | Phosphoenolpyruvate-protein phosphotransferase                                                | 63  | 1  | 0 | 3 | 1  | 1 | 15 |
| P49814 | <i>mdh</i>   | Malate dehydrogenase                                                                          | 34  | 2  | 1 | 5 | 9  | 2 | 10 |
| P54466 | <i>yqfA</i>  | UPF0365 protein                                                                               | 36  | 0  | 1 | 4 | 4  | 2 | 11 |
| O32165 | <i>sufD</i>  | FeS cluster assembly protein                                                                  | 48  | 1  | 0 | 4 | 4  | 1 | 12 |
| O31728 | <i>sepF</i>  | Cell division protein sepF                                                                    | 17  | 5  | 5 | 3 | 5  | 3 | 3  |
| Q45066 | <i>parC</i>  | DNA topoisomerase 4 subunit A                                                                 | 91  | 1  | 0 | 0 | 0  | 0 | 12 |
| P40924 | <i>pgk</i>   | Phosphoglycerate kinase                                                                       | 42  | 5  | 1 | 2 | 4  | 2 | 7  |
| P70974 | <i>rplM</i>  | 50S ribosomal protein L13                                                                     | 16  | 4  | 5 | 4 | 5  | 0 | 3  |
| P94360 | <i>msmX</i>  | Maltodextrin import ATP-binding protein                                                       | 41  | 5  | 3 | 0 | 5  | 0 | 7  |
| Q03223 | <i>rpmE</i>  | 50S ribosomal protein L31                                                                     | 7   | 2  | 3 | 0 | 6  | 0 | 2  |
| P80865 | <i>sucD</i>  | Succinyl-CoA ligase [ADP-forming] subunit alpha                                               | 31  | 3  | 1 | 6 | 10 | 4 | 7  |
| P12879 | <i>rpsH</i>  | 30S ribosomal protein S8                                                                      | 15  | 4  | 2 | 3 | 8  | 3 | 3  |
| O34338 | <i>mntB</i>  | Manganese transport system ATP-binding protein                                                | 28  | 6  | 0 | 5 | 1  | 5 | 2  |
| P37814 | <i>atpF</i>  | ATP synthase subunit b                                                                        | 19  | 3  | 0 | 5 | 2  | 3 | 7  |
| P42437 | <i>nasF</i>  | Uroporphyrinogen-III C-methyltransferase                                                      | 54  | 5  | 0 | 0 | 3  | 0 | 9  |
| O54408 | <i>relA</i>  | GTP pyrophosphokinase                                                                         | 85  | 8  | 0 | 3 | 1  | 3 | 12 |
| O32201 | <i>liaH</i>  | Similar to phage shock protein, resistance against oxidative stress and cell wall antibiotics | 26  | 2  | 8 | 2 | 4  | 2 | 6  |
| P46899 | <i>rplR</i>  | 50S ribosomal protein L18                                                                     | 13  | 2  | 8 | 7 | 5  | 5 | 3  |
| P19946 | <i>rplO</i>  | 50S ribosomal protein L15                                                                     | 15  | 4  | 5 | 7 | 5  | 5 | 2  |
| P50849 | <i>pnp</i>   | Polyribonucleotide nucleotidyltransferase                                                     | 77  | 0  | 1 | 1 | 8  | 0 | 10 |
| P71088 | <i>spo0M</i> | Sporulation-control protein                                                                   | 30  | 4  | 4 | 9 | 7  | 9 | 4  |
| P37486 | <i>yybR</i>  | Uncharacterized HTH-type transcriptional regulator                                            | 15  | 7  | 7 | 0 | 3  | 0 | 2  |
| Q45057 | <i>yneB</i>  | Resolvase homolog                                                                             | 25  | 10 | 4 | 0 | 2  | 0 | 1  |
| O31755 | <i>proS</i>  | Prolyl-tRNA synthetase                                                                        | 63  | 5  | 0 | 4 | 3  | 0 | 11 |
| Q45477 | <i>ileS</i>  | Isoleucyl-tRNA synthetase                                                                     | 105 | 0  | 0 | 2 | 6  | 2 | 11 |
| P54482 | <i>ispG</i>  | 4-hydroxy-3-methylbut-2-en-1-yl diphosphate synthase                                          | 41  | 3  | 0 | 3 | 6  | 2 | 10 |
| P54617 | <i>ydjF</i>  | Phage shock protein A homolog                                                                 | 25  | 0  | 0 | 5 | 0  | 4 | 9  |

|        |             |                                                             |     |    |   |   |   |   |    |
|--------|-------------|-------------------------------------------------------------|-----|----|---|---|---|---|----|
| O32213 | <i>cysI</i> | Sulfite reductase [NADPH] hemoprotein beta-component        | 65  | 0  | 0 | 5 | 7 | 2 | 10 |
| O34949 | <i>ykoM</i> | Uncharacterized HTH-type transcriptional regulator          | 18  | 7  | 9 | 3 | 2 | 2 | 3  |
| P05649 | <i>dnaN</i> | DNA polymerase III subunit beta                             | 42  | 5  | 1 | 8 | 4 | 8 | 11 |
| P21472 | <i>rpsL</i> | 30S ribosomal protein S12                                   | 15  | 2  | 1 | 3 | 6 | 2 | 3  |
| P46336 | <i>iolS</i> | Unknown                                                     | 35  | 4  | 1 | 7 | 5 | 6 | 9  |
| P35136 | <i>serA</i> | D-3-phosphoglycerate dehydrogenase                          | 57  | 0  | 0 | 1 | 5 | 0 | 9  |
| P51785 | <i>ilvD</i> | Dihydroxy-acid dehydratase                                  | 60  | 0  | 1 | 4 | 2 | 2 | 12 |
| P20282 | <i>rpsM</i> | 30S ribosomal protein S13                                   | 14  | 3  | 4 | 0 | 3 | 0 | 4  |
| P25812 | <i>mnmG</i> | tRNA uridine 5-carboxymethylaminomethyl modification enzyme | 70  | 3  | 0 | 0 | 2 | 0 | 11 |
| Q02113 | <i>lytB</i> | Amidase enhancer                                            | 77  | 6  | 2 | 2 | 0 | 0 | 10 |
| P97032 | <i>yhbD</i> | Uncharacterized protein                                     | 27  | 10 | 5 | 0 | 0 | 0 | 2  |
| O06973 | <i>yvcJ</i> | UPF0042 nucleotide-binding protein                          | 34  | 10 | 6 | 0 | 4 | 0 | 0  |
| P96683 | <i>ydfF</i> | Uncharacterized HTH-type transcriptional regulator          | 26  | 8  | 6 | 0 | 0 | 0 | 0  |
| O32164 | <i>csd</i>  | Probable cysteine desulfurase                               | 45  | 6  | 0 | 3 | 2 | 3 | 7  |
| O34910 | <i>yobT</i> | Uncharacterized protein                                     | 25  | 4  | 6 | 0 | 4 | 0 | 4  |
| Q08352 | <i>ald</i>  | Alanine dehydrogenase                                       | 40  | 4  | 0 | 1 | 3 | 0 | 10 |
| P12875 | <i>rplN</i> | 50S ribosomal protein L14                                   | 13  | 4  | 3 | 3 | 5 | 2 | 3  |
| O07906 | <i>yraN</i> | Uncharacterized HTH-type transcriptional regulator          | 34  | 10 | 4 | 0 | 4 | 0 | 2  |
| P36948 | <i>rbsC</i> | Ribose transport system permease protein                    | 34  | 2  | 1 | 1 | 5 | 1 | 4  |
| P40871 | <i>dhbE</i> | 2,3-dihydroxybenzoate-AMP ligase                            | 60  | 4  | 2 | 0 | 0 | 0 | 10 |
| O07631 | <i>typA</i> | GTP-binding protein TypA/BipA homolog                       | 68  | 1  | 0 | 2 | 2 | 0 | 9  |
| O31776 | <i>tdh</i>  | L-threonine 3-dehydrogenase                                 | 37  | 5  | 1 | 5 | 4 | 5 | 8  |
| P18255 | <i>thrS</i> | Threonyl-tRNA synthetase 1                                  | 74  | 5  | 0 | 2 | 5 | 1 | 8  |
| P77837 | <i>ureC</i> | Urease subunit alpha                                        | 61  | 2  | 0 | 1 | 0 | 1 | 12 |
| P42924 | <i>rplW</i> | 50S ribosomal protein L23                                   | 11  | 1  | 4 | 1 | 6 | 1 | 4  |
| P80861 | <i>yjiD</i> | NADH dehydrogenase-like protein                             | 42  | 5  | 3 | 2 | 4 | 1 | 4  |
| Q45598 | <i>yydD</i> | Uncharacterized protein                                     | 69  | 1  | 0 | 1 | 1 | 0 | 11 |
| Q795Y4 | <i>yrhE</i> | Putative formate dehydrogenase                              | 109 | 3  | 1 | 2 | 0 | 1 | 9  |
| O32119 | <i>yutI</i> | Putative nitrogen fixation protein                          | 12  | 1  | 2 | 0 | 3 | 2 | 4  |

|                |             |                                                |     |   |   |    |   |    |    |
|----------------|-------------|------------------------------------------------|-----|---|---|----|---|----|----|
| P46320         | <i>licH</i> | Probable 6-phospho-beta-glucosidase            | 49  | 3 | 2 | 8  | 1 | 6  | 7  |
| P21475         | <i>rpsR</i> | 30S ribosomal protein S18                      | 9   | 5 | 1 | 0  | 4 | 0  | 1  |
| P42419         | <i>ioll</i> | Inosose isomerase                              | 32  | 3 | 0 | 5  | 8 | 2  | 6  |
| O07020         | <i>lutA</i> | Lactate utilization protein A                  | 26  | 3 | 1 | 15 | 3 | 13 | 4  |
| P40806         | <i>pksJ</i> | Polyketide synthase                            | 563 | 3 | 1 | 2  | 2 | 0  | 5  |
| P42974         | <i>ahpF</i> | NADH dehydrogenase                             | 55  | 2 | 0 | 0  | 2 | 0  | 4  |
| P96499         | <i>yvhJ</i> | Putative transcriptional regulator             | 43  | 8 | 0 | 0  | 2 | 1  | 6  |
| P24139         | <i>oppC</i> | Oligopeptide transport system permease protein | 34  | 4 | 1 | 0  | 1 | 0  | 2  |
| P28368         | <i>yvyD</i> | Uncharacterized protein                        | 22  | 4 | 2 | 4  | 3 | 4  | 3  |
| P34957         | <i>qoxa</i> | Quinol oxidase subunit 2                       | 36  | 4 | 0 | 1  | 2 | 1  | 5  |
| O06008         | <i>adhR</i> | HTH-type transcriptional regulator             | 16  | 3 | 7 | 1  | 2 | 0  | 3  |
| Q796K8         | <i>pbpH</i> | Penicillin-binding protein H                   | 79  | 0 | 1 | 0  | 2 | 0  | 8  |
| O34925         | <i>deoD</i> | Purine nucleoside phosphorylase deoD-type      | 25  | 4 | 1 | 1  | 3 | 0  | 5  |
| O06474         | <i>yfmP</i> | HTH-type transcriptional regulator             | 17  | 6 | 2 | 4  | 1 | 1  | 1  |
| P17922         | <i>pheT</i> | Phenylalanyl-tRNA synthetase beta chain        | 88  | 0 | 0 | 2  | 0 | 2  | 10 |
| P05657         | <i>rpmA</i> | 50S ribosomal protein L27                      | 10  | 2 | 3 | 2  | 4 | 2  | 4  |
| P39765         | <i>pyrR</i> | Bifunctional protein                           | 20  | 6 | 1 | 12 | 1 | 6  | 3  |
| P80866         | <i>yurY</i> | Vegetative protein 296                         | 29  | 0 | 3 | 4  | 2 | 0  | 5  |
| P21468         | <i>rpsF</i> | 30S ribosomal protein S6                       | 11  | 4 | 4 | 0  | 5 | 0  | 4  |
| P32395         | <i>hemE</i> | Uroporphyrinogen decarboxylase                 | 40  | 4 | 2 | 4  | 5 | 3  | 6  |
| O31630         | <i>yjch</i> | Uncharacterized protein                        | 28  | 6 | 2 | 7  | 2 | 5  | 0  |
| O34784         | <i>yobl</i> | Uncharacterized membrane protein               | 141 | 1 | 0 | 6  | 0 | 6  | 6  |
| A7BJC5<br>(+1) | <i>iolB</i> | 5-deoxy-glucuronate isomerase                  | 31  | 3 | 0 | 6  | 6 | 4  | 7  |
| O34384         | <i>yceE</i> | Uncharacterized protein                        | 21  | 3 | 0 | 3  | 1 | 3  | 4  |
| P39215         | <i>mcpB</i> | Methyl-accepting chemotaxis protein            | 72  | 2 | 1 | 2  | 0 | 0  | 6  |
| P42958         | <i>ycaA</i> | Probable tartrate dehydrogenase/decarboxylase  | 39  | 0 | 1 | 1  | 2 | 0  | 6  |
| P50740         | <i>fni</i>  | Isopentenyl-diphosphate delta-isomerase        | 37  | 9 | 1 | 0  | 0 | 0  | 1  |
| O31605         | <i>yjbG</i> | Oligoendopeptidase F homolog                   | 77  | 0 | 1 | 0  | 0 | 0  | 9  |

|        |              |                                                     |     |   |   |   |   |   |   |
|--------|--------------|-----------------------------------------------------|-----|---|---|---|---|---|---|
| O34774 | <i>yobJ</i>  | Uncharacterized protein                             | 34  | 3 | 9 | 0 | 3 | 0 | 1 |
| O07584 | <i>plsC</i>  | 1-acyl-sn-glycerol-3-phosphate acyltransferase      | 22  | 4 | 1 | 0 | 1 | 0 | 3 |
| O05389 | <i>yrbE</i>  | Uncharacterized oxidoreductase                      | 38  | 5 | 0 | 2 | 2 | 0 | 4 |
| P54510 | <i>yqhL</i>  | Uncharacterized protein                             | 15  | 7 | 4 | 0 | 2 | 2 | 0 |
| P30950 | <i>hemB</i>  | Delta-aminolevulinic acid dehydratase               | 36  | 3 | 0 | 0 | 5 | 0 | 6 |
| O31501 | <i>swrC</i>  | Swarming motility protein                           | 114 | 0 | 0 | 0 | 0 | 0 | 6 |
| P80698 | <i>tig</i>   | Trigger factor                                      | 47  | 5 | 1 | 0 | 2 | 0 | 6 |
| P96583 | <i>topB</i>  | DNA topoisomerase 3                                 | 81  | 0 | 2 | 0 | 1 | 0 | 4 |
| O31716 | <i>ykpA</i>  | Uncharacterized ABC transporter ATP-binding protein | 61  | 1 | 0 | 8 | 2 | 0 | 6 |
| O07605 | <i>gltT</i>  | Proton/sodium-glutamate symport protein             | 46  | 1 | 0 | 0 | 3 | 0 | 5 |
| P80700 | <i>tsf</i>   | Elongation factor Ts                                | 32  | 0 | 0 | 0 | 3 | 0 | 6 |
| O32044 | <i>recJ</i>  | Single-stranded-DNA-specific exonuclease            | 88  | 0 | 0 | 0 | 1 | 0 | 8 |
| P54608 | <i>yhcX</i>  | UPF0012 hydrolase                                   | 60  | 2 | 0 | 0 | 0 | 0 | 6 |
| Q02114 | <i>lytC</i>  | N-acetylmuramoyl-L-alanine amidase                  | 53  | 1 | 1 | 2 | 1 | 2 | 4 |
| P94545 | <i>mutSB</i> | MutS2 protein                                       | 87  | 0 | 1 | 0 | 0 | 0 | 4 |
| Q795M6 | <i>yugH</i>  | Putative aminotransferase                           | 42  | 5 | 0 | 5 | 1 | 3 | 3 |
| Q04796 | <i>dapA</i>  | Dihydrodipicolinate synthase                        | 31  | 0 | 1 | 4 | 2 | 3 | 6 |
| O32090 | <i>pcnB</i>  | Nicotinate phosphoribosyltransferase                | 56  | 4 | 0 | 0 | 1 | 0 | 6 |
| P12013 | <i>gntZ</i>  | 6-phosphogluconate dehydrogenase, decarboxylating   | 52  | 0 | 0 | 0 | 4 | 0 | 4 |
| P38494 | <i>ypfD</i>  | 30S ribosomal protein S1 homolog                    | 42  | 0 | 0 | 0 | 1 | 0 | 6 |
| P21476 | <i>rpsS</i>  | 30S ribosomal protein S19                           | 11  | 3 | 3 | 2 | 4 | 1 | 2 |

**Figure S1: Spo0A levels are not decreased in *ymcA*, *ylbF* and *yaaT* mutants.**

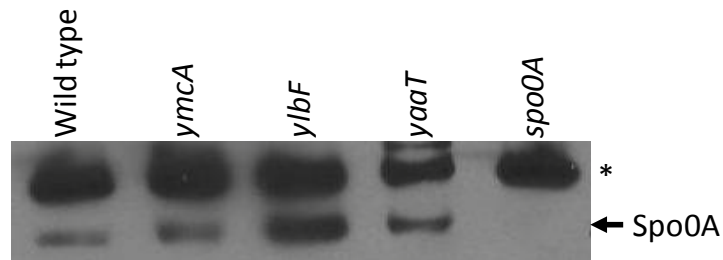

Wild type (BD630), *ymcA* (BD3032), *ylbF* (BD2741), *yaaT* (BD5635) and *spo0A* (BD4576) were grown in DSM until  $T_0$ . Whole cell extracts were prepared as described in the Supporting information, and samples were analyzed by immunoblotting with Spo0A antiserum. The asterisk represented a non-specific cross-reacting band that was included in the figure as a loading control.

Figure S2: A *ylbF* mutation has an intermediate effect on transcription of *abrB::luc*.

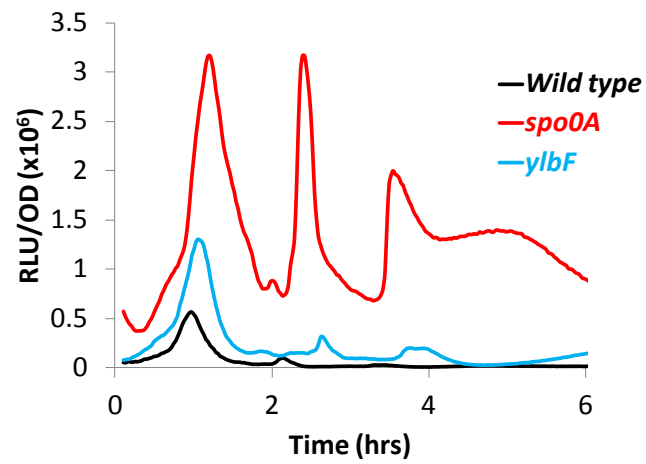

The *abrB::luc* construct was made as described previously (Mirouze *et al.*, 2011), with the native *abrB* ribosome binding site (RBS) replaced by the *spoVG* RBS. Luciferase assays for expression from the  $P_{abrB}$ -*luc* reporter construct were carried out as described in Experimental procedures. Wild type (BD5829), *spo0A* (BD5860), *ylbF* (BD6707).



**Figure S3: Concentration-dependent effects of YlbF- and GST-YlbF-containing complexes.**

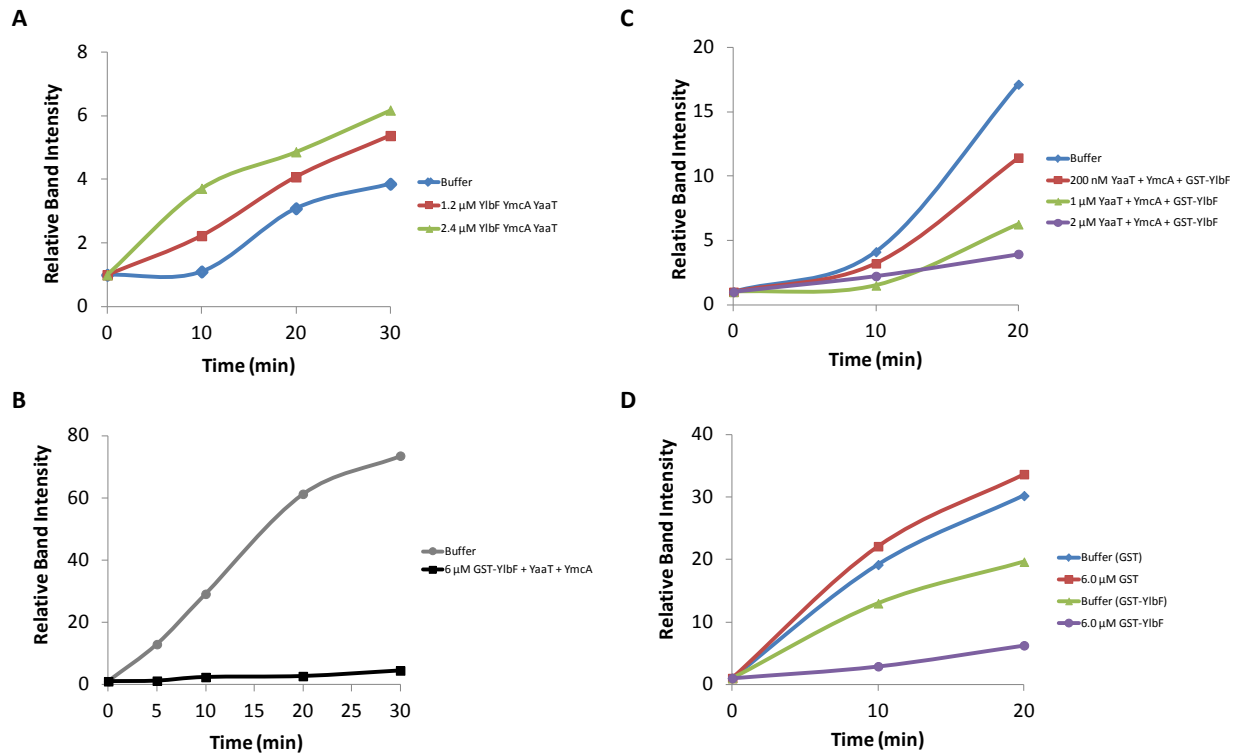

(A) The YmcA-YlbF-YaaT complex exhibits a dose-responsive effect on the rate of the phosphorelay. The phosphorelay proteins were pre-incubated with 1.2 μM or with 2.4 μM YmcA-YlbF-YaaT co-purified complex. The relay was initiated by the addition of  $^{32}\text{P}$ - $\gamma$ -ATP, and samples were collected at the indicated time points. Bands were quantified as described in Experimental procedures, and total phosphate is depicted in each graph. (B-D) GST-YlbF inhibits the phosphorelay. Concentrations of a 1:1:1 mixture of individually purified GST-YlbF, YmcA and YaaT used were as follows: 200 nM, 1 μM, 2 μM (B) or 6 μM (C). To determine if GST-YlbF could inhibit the phosphorelay without its binding partners, 6 μM GST-YlbF was pre-incubated with the relay proteins, and purified GST was used as a control (D). GST and GST-YlbF were purified as described in Experimental procedures for GST-YmcA, with a single exception. GST-YlbF was purified in 20 mM HEPES, pH 7.5, 2 mM  $\text{MgCl}_2$  instead of phosphate buffer, and thus has a separate buffer control, as indicated. Samples were collected and analyzed as described above.

## Additional Experimental Procedures

### *Plasmid constructions*

#### *Construction of YFP fusion proteins*

All oligonucleotides were synthesized by Integrated DNA Technologies. For construction of *ymcA-yfp*, its C-terminal 341 bp without its stop codon was amplified from BD630 genomic DNA, using the primers 5ymcA-mfeI and 5ymcA-xhoI (Table S2, restriction sites indicated by capital letters). The resulting amplicon was digested with *MfeI* and *XhoI* and ligated into the *EcoRI* and *XhoI* sites of the plasmid *pKL184* (a gift from K. Lemon and A. Grossman). This resulted in a fusion of *yfp* to the C-terminus of the '*ymcA* C-terminal fragment (*pED1279*). To make the *ylbF-yfp* fusion a similar strategy was used. A C-terminal 394 bp fragment of *ylbF* was amplified using the primers 5ylbF-ecoRI and 3ylbF-xhoI (Table S2), digested with *EcoRI* and *XhoI* and ligated into the same sites of *pKL184* (*pED1229*). The resulting plasmids were transformed into chemically competent DH5 $\alpha$  *E. coli* cells, and the constructs were verified by DNA sequence analysis by MacroGen, Inc. (New York, NY). Once confirmed, the plasmids were transformed into BD630 for Campbell-type integration into the native locus, selecting for chloramphenicol resistance. This created *ymcA-yfp* and *ylbF-yfp* fusions, each under the control of its native promoter, inactivating the native copy of *ymcA* and *ylbF*.

For construction of *yfp-yaaT*, the entire *yaaT* open reading frame (ORF) was amplified from BD630 genomic DNA, using the primers 5YFP-yaaT-INF and 3YFP-yaaT-INF (Table S2, red letters indicate homology to the vector sequence). The vector *pDR111-YFP* (Kramer *et al.*, 2007) was digested overnight with *Sall* and *SphI*. For cloning, the In-Fusion HD cloning kit (Clontech) was used, as per manufacturer's instructions. The resulting plasmid was transformed into

Stellar (Clontech) competent cells, and the plasmid sequence was verified as described above. The plasmid (pED1510) was transformed into BD630 selecting for spectinomycin resistance, placing the *yfp-yaaT* fusion under the control of the 1 mM isopropyl  $\beta$ -D-1-thiogalactopyranoside (IPTG)-inducible P<sub>hyperspank</sub> promoter at the ectopic *amyE* locus.

#### *Generation of the yaaT knockout and promoter fusions*

The *yaaT* gene lies in the middle of a large operon, with genes that are important for DNA replication. To not disrupt the downstream genes, *yaaT* was cloned into *pMutin4* (Vagner *et al.*, 1998). A 465 bp internal fragment of *yaaT* was amplified from BD630 genomic DNA using the primers 5yaaTKO-*ecoRI* and 3yaaTKO-*bamHI* (Table S2). Following digestion, the fragment was ligated into the *EcoRI* and *BamHI* sites of *pMutin4*. The plasmid (p*Mutin4-yaaTKO*, pED1495) was transformed into DH5 $\alpha$  cells and verified by sequencing. It was then used to transform BD630 by Campbell integration, with selection for erythromycin resistance, creating a knockout of the chromosomal *yaaT* gene, and a transcriptional promoter fusion to *lacZ*, with the downstream genes under control of the IPTG-inducible promoter P<sub>spac</sub>. To enable  $\beta$ -galactosidase assays with *lacZ* reporter fusions, it was necessary to create a variant of this *yaaT* knockout with the *lacZ* gene contained within *pMutin4* inactivated. For this, p*Mutin4-yaaTKO* was digested with *SwaI* and *FspI*, which generate blunt ends, removing the *lacZ* coding sequence. After ligation, the new plasmid was verified by restriction digestion and then used to transform BD630, selecting for erythromycin resistance. For all experiments, these strains were grown in the presence of IPTG.

To create *lacZ* transcriptional fusions to the *ylbF* and *ymcA* genes, *pMutin4* was used. The primers 5ylbF-mutin4 and 3ylbF-mutin4 (Table S2) were used to amplify a 400 bp internal fragment of *ylbF* from BD630 genomic DNA. An internal 398 bp fragment was similarly obtained for *ymcA* using the primers 5ymcA-mutin4 and 3 ymcA-mutin4 (Table S2). Both fragments were digested with *HindIII* and *BamHI* and ligated into the *HindIII* and *BamHI* sites of *pMutin4*. The resulting products (*pED1519* and *pED1518*) were verified by sequencing, and then transformed into competent BD630, selecting for erythromycin resistance. These constructs generated chromosomal knockouts of the native gene, either *ymcA* or *ylbF*, as well as promoter fusions to *lacZ*. These strains were grown in the presence of 1 mM IPTG for all experiments, although no difference in reporter gene expression was noted when IPTG was omitted (not shown).

#### *Construction of expression plasmids for protein purification*

To construct *GST-ymcA* (*pED1333*), the entire *ymcA* ORF, including its stop codon, was amplified from the BD630 chromosome using the primers 5ymcA-GST-INF and 3ymcA-GST-INF. To construct *GST-ylbF* (*pED1334*) the entire *ylbF* ORF was amplified using the primers 5ylbF-GST-INF and 3ylbF-GST-INF (Table S2). To create the *GST-spo0E* (*pED1602*) construct, the entire ORF, including the stop codon, was amplified using the primers 5spo0E-GST-INF and 3spo0E-GST-INF (Table S2). The plasmid *pGEX-6P-1* (GE Healthcare) was linearized overnight using *EcoRI* and *XbaI* for *ymcA* and *ylbF* cloning, and with *EcoRI* and *XhoI* for *spo0E* cloning. The cloning was performed using the In-Fusion HD kit, as per manufacturer's instructions. DNA sequencing confirmed the correct inserts, in-frame with the tags. These resulting constructs express in-

frame N-terminally GST-tagged proteins, with a PreScission Protease (GE Healthcare) site for removal of the tag, all under control of the IPTG-inducible  $P_{tac}$  promoter.

To create a *His<sub>6</sub>-SUMO-yaaT* expressing plasmid (pED1450), the entire *yaaT* ORF, including its stop codon, was amplified from BD630 genomic DNA using the primers 5yaaT-SUMO-INF and 3yaaT-SUMO-INF (Table S2). The vector *pTB146* (Bendezu *et al.*, 2009) was digested overnight with *SapI* and *XhoI*, and the In-Fusion HD kit was used for cloning. The resulting plasmid places the *His<sub>6</sub>-SUMO-yaaT* construct under T7-polymerase control, and contains a SUMO Protease (Invitrogen) site for removal of the tag. After confirmation by sequencing, the plasmid was transformed into chemically competent BL21 (DE3) cells for expression.

#### *Construction of plasmids for bacterial 2-hybrid assays*

The plasmids *pT18C-amp* and *pT25N-kan* (Karimova *et al.*, 1998) were used for cloning. Cloning into *pT18C* fuses a test protein to the C-terminus of the T18 fragment of *cyo*, while the *pT25N* vector fuses a test protein to the N-terminus of the T25 fragment of *cyo*. Both plasmids result in protein fusions, under the control of the IPTG-inducible *lac UV5* promoter, which is cAMP-CAP independent. The primers to generate the *ymcA* (pED1350, and pED1384), *ylbF* (pED1307) and *yaaT* (pED1385) fusions, as well as fusions to the members of the phosphorelay; *spo0A* (pED1459), *spo0B* (pED1460), *spo0F* (pED1467), and *kinA* (pED1466), are listed in Table S2. For all constructs, PCR was performed on BD630 genomic DNA. The *ylbF* and *ymcA* PCR products were ligated into the *BamHI* and *KpnI* sites of *pT25N*. For all other constructs, the In-Fusion HD cloning kit was used, and the vectors were linearized overnight using *BamHI* and *EcoRI* for

pT18C, and *HinDIII* and *XbaI* for pT25N. Plasmids were transformed into Stellar or DH5 $\alpha$  competent cells for storage.

#### *Grinding and lysis of cells for mass spectrometry*

*Bacillus subtilis* strains carrying YFP fusions were inoculated into a 100 ml overnight culture in LB containing appropriate antibiotics. The overnight culture was diluted 1:100 (v/v) into 4L fresh DSM and grown for 5-6 hrs to T<sub>1</sub>. Cells were harvested by centrifugation, with two 15 min spins at 4500 x *g* in a Beckman Coulter centrifuge (Avanti J-25, rotor JLA 8.1000), followed by two additional 15 min spins at 5000 x *g* (rotor JA-12). The resulting cell pellets were weighed, and 100  $\mu$ L of 20 mM HEPES, pH 7.5, 1.2% (w/v) polyvinyl-pyrrolidone (Sigma), 1/100 (v/v) EDTA-free protease inhibitor cocktail (Roche Diagnostics) were added per gram of cells. Cells were frozen as small pellets in liquid nitrogen as described previously (Cristea *et al.*, 2005, Carabetta *et al.*, 2010).

Cryogenic cell lysis was performed as described previously (Cristea *et al.*, 2005) by grinding in a Retsch MM 301 Mixer Mill (Retsch, Newtown, PA) for 20 cycles, 3 min per cycle at a frequency of 30 Hz. The lysis buffer contained 20 mM HEPES, pH 7.4, 100 mM potassium acetate, 2 mM MgCl<sub>2</sub>, 0.1% tween-20 (v/v), 1  $\mu$ M ZnCl<sub>2</sub>, 1  $\mu$ M CaCl<sub>2</sub>, 0.2% Triton-X, 150 mM NaCl, 10  $\mu$ g/ $\mu$ l DNaseI, 1:100 protease inhibitor cocktail (Sigma) and 0.1 mg/ml phenylmethylsulphonyl fluoride (PMSF). Three grams of frozen cell powder was immediately added to 21 ml of lysis buffer. When the powder had thawed it was homogenized for 20 s using a PT 10-35 GT Polytron (Kinematica). The clarified lysate was centrifuged for 10 min, 8000 x *g* at 4°C, and the supernatant was used for the affinity purification experiments.

### *Conjugation of magnetic beads and Immunopurifications*

Polyclonal anti-GFP antibody was prepared, purified, and conjugated to M270 Epoxy Dynabeads (Dyna, Invitrogen) as described previously (Cristea *et al.*, 2005). For each immunopurification, 7 mg of the conjugated magnetic beads were incubated with 21 ml cell lysates, prepared as described above, at 4°C for 1 hr (Cristea *et al.*, 2005). The magnetic beads were recovered by passing the mixture over a magnet (Magcraft) for 10 minutes. The beads were then washed six times with lysis buffer, without inhibitors or enzymes, and one time with water. Proteins were eluted from the beads directly into either lithium dodecyl sulfate (LDS)-PAGE sample buffer (Invitrogen) if in-gel digestion was to be performed, or into TEL buffer (26 mM Tris-HCl, 35 mM Tris-base, 127  $\mu$ M EDTA, 0.5% LDS, pH 8.5) for in-solution digestion. All samples were alkylated with 100 mM iodoacetamide for 30 minutes at room temperature.

### *In-solution and in-gel protein digestion*

For in-gel digestion, samples were resolved on a 4–12% NuPAGE Novex Bis-Tris gel (Invitrogen) according to the manufacturer's instructions. The gels were stained with SimplyBlue Coomassie stain (Invitrogen). Each gel lane was cut up into 1 mm slices, and further cut into small pieces. Gel pieces were destained, dehydrated and rehydrated as previously described (Tsai *et al.*, 2012). After a final dehydration, the gel pieces were incubated with 12.5 ng/ $\mu$ l of sequencing grade trypsin (Promega, Madison, WI) overnight at 37°C. The resulting peptides were extracted from the gel pieces by incubation in 0.5% formic acid for 4 hrs at room temperature (RT), followed by a second incubation in 0.5% formic acid/50% acetonitrile (ACN) for an additional 2

hrs. The extracted peptides were pooled into 4 equal fractions, and were concentrated by vacuum centrifugation to ~12  $\mu$ l.

For in-solution digestion, eluted protein samples were reduced with 1 mM dithiothreitol (DTT), and digested on a filter (Vivacon 500 centrifugal filters (10K cutoff), Sartorius Stedim Biotech, Goettingen, Germany) with 100  $\mu$ l of 5 ng/ $\mu$ l trypsin in 50 mM ammonium bicarbonate by a filter-aided sample preparation method (FASP) as described (Wisniewski *et al.*, 2009). The eluted peptide fraction was concentrated by vacuum centrifugation to a final volume of ~12  $\mu$ l, as before.

### *Mass Spectrometry*

The mass spectrometry procedure was carried out as previously described (Tsai *et al.*, 2012, Greco *et al.*, 2012). Briefly, half of the elution sample was analyzed by nLC-MS/MS on a Dionex Ultimate 3000 RSLC coupled directly to an LTQ-Orbitrap Velos ETD mass spectrometer (ThermoFisher Scientific, San Jose, CA). Peptides were separated by reverse phase chromatography over a 3 hr gradient for in-solution, or a 90 min gradient for in-gel digested samples, from 4 to 35% B, where solvent A is 0.1% formic acid/0.1% acetic acid in water, and solvent B is 0.1% formic acid/0.1% acetic acid in 97% ACN. Details on the mass spectrometer settings can be found in Tsai *et al.*, 2012 and Greco *et al.*, 2012. The MS/MS spectra were acquired by collision-induced dissociation (CID) fragmentation. All immunopurifications and mass spectrometric data analysis were repeated.

### *Mass spectrometry data processing*



Data was analyzed as described previously (Tsai *et al.*, 2012, Greco *et al.*, 2012). Briefly, MS/MS spectra were extracted by Proteome Discoverer (ver. 1.3, Thermo Fisher Scientific, San Jose, CA) and then further analyzed by SEQUEST (ver. 1.3.0.339, Thermo Fisher Scientific, San Jose, CA) and X! Tandem (ver. CYCLONE (2010.12.01.1), The GPM, thegpm.org) for peptide database searching against the UniProt SwissProt sequence database (downloaded 11/2010). The search was performed against the *Bacillus subtilis* database, including some common contaminant sequences (4374 entries). Parameters of the search were as followed as described previously (Tsai *et al.*, 2012), including the following modifications: static modification of carbamidomethylcysteine (+57 Da), variable modifications of methionine oxidation (+16 Da), phosphoserine, threonine, and tyrosine (+80 Da). Peptide spectrum matches (PSMs) were analyzed and validated by Scaffold (ver. 3.2; Proteome Software, Inc.), as described previously (Tsai *et al.*, 2012).

#### *Western blot analysis*

*Bacillus* strains were grown in DSM until T<sub>0</sub> and 1 ml samples taken. Extracts were prepared by pelleting the cells, and washing in an equal volume of STM (50 mM NaCl, 25% sucrose, 50 mM Tris-HCl, pH 8.5, 5 mM MgCl<sub>2</sub>). Cells were lysed by addition of STM supplemented with 350 µg/µl lysozyme, normalized to Klett value and incubated at 37°C for 5 minutes. Samples were mixed with cracking buffer (0.225 M Tris-HCl, pH 6.8, 50% glycerol, 5% SDS, 0.05% bromophenol blue, 1 % β-mercaptoethanol), boiled for 10 minutes, and equal volumes were loaded on a 12.5% tris-tricine gel. Following SDS-PAGE, proteins were transferred to a Protran nitrocellulose membrane (Whatman), and probed using a 1:5000 dilution of anti-Spo0A

antibody then a 1:5000 dilution of purified goat anti-rabbit antibodies conjugated to peroxidase (Kirkegaard & Perry Laboratories). Bands were visualized using the enhanced chemiluminescence ECL prime kit (Amersham) and Hyblot CL autoradiography film (Denville Scientific Inc).

## References

- Bendezu F.O., Hale, C.A., Bernhardt, T.G., and de Boer, P.A. (2009) RodZ (YfgA) is required for proper assembly of the MreB actin cytoskeleton and cell shape in *E. coli*. *EMBO J* **28**: 193–204.
- Carabetta, V.J., Silhavy, T.J., and Cristea, I.M. (2010) The response regulator SprE (RssB) is required for maintaining poly(A) polymerase I-degradosome association during stationary phase. *J. Bacteriol* **192**: 3713-3721.
- Cristea, I.M., Williams, R., Chait, B.T., and Rout, M.P. (2005) Fluorescent proteins as proteomic probes. *Mol Cell Proteomics* **4**:1933-1941.
- Fujita, M., and Losick, R. (2003) The master regulator for entry into sporulation in *Bacillus subtilis* becomes a cell-specific transcription factor after asymmetric division. *Genes Dev* **17**: 1166-1174.
- Greco, T.M., Miteva, Y., Conlon, F.L., and Cristea, I.M. (2012) Complementary proteomic analysis of protein complexes. *Methods Mol Biol* **917**: 391-407.
- Hahn, J., Roggian, M., and Dubnau, D. (1995) The major role of Spo0A in genetic competence is to downregulate *abrB*, an essential competence gene. *J Bacteriol* **177**: 3601-3605.
- Karimova, G., Pidoux, J., Ullmann, A., and Ladant, D. (1998) A bacterial two-hybrid system based on a reconstituted signal transduction pathway. *Proc Natl Acad Sci USA* **95**: 5752–5756.
- Kearns, D.B., Chu, F., Branda, S.S., Kolter, R. and Losick, R. (2005) A master regulator of biofilm formation by *Bacillus subtilis*. *Mol Microbiol* **55**: 739-749.
- Kramer N., Hahn, J., and Dubnau, D. (1997) Multiple interactions amongst the competence proteins of *Bacillus subtilis*. *Mol Microbiol* **65**: 454-464.
- Mirouze, N., Prepiak, P., and Dubnau, D. (2011) Fluctuations in *spo0A* transcription control rare developmental transitions in *Bacillus subtilis*. *PLoS Genet* **7**: e1002048.

Muchová, K., Lewis, R.J., Perečko, D., Brannigan, J.A., Ladds, J.C., Leech, A., Wilkinson, A.J., and Barák, I. (2004) Dimer-induced signal propagation in Spo0A. *Mol Microbiol* **53**: 829-842.

Prepiak, P., Defrancesco, M., Spadavecchia, S., Mirouze, N., Albano, M., Persuh, M., *et al.* (2011) MecA dampens transitions to spore, biofilm, exopolysaccharide and competence expression by two different mechanisms. *Mol Microbiol*. **80**: 1014-1030.

Tortosa, P., Albano, M., and Dubnau, D. (2000) Characterization of *ylbF*, a new gene involved in competence development and sporulation in *Bacillus subtilis*. *Mol Microbiol* **35**: 1110-1119.

Tsai, Y.C., Greco, T.M., Boonmee, A., Miteva, Y., and Cristea, I.M. (2012) Functional proteomics establishes the interaction of SIRT7 with chromatin remodeling complexes and expands its role in regulation of RNA Pol I transcription. *Mol Cell Proteomics* **11**: M111.015156.

Turgay, K., Hahn, J., Burghoorn, J., and Dubnau, D. (1998) Competence in *Bacillus subtilis* is controlled by regulated proteolysis of a transcription factor. *EMBO J* **17**: 6730-6738.

Vagner, V., Dervyn, E., and Ehrlich, S.D. (1998) A vector for systematic gene inactivation in *Bacillus subtilis*. *Microbiology* **144**: 3097-3104.

Wisniewski J.R., Zougman, A., Nagaraj, N., and Mann, M. (2009) Universal sample preparation method for proteome analysis. *Nat. Methods* **6**: 359–362.
